# Supplementary material for: Prevalence of obesity, metabolic syndrome, diabetes and risk of cardiovascular disease in a psychiatric inpatient sample: results of the Metabolism in Psychiatry (MiP) Study
Source: Springer Nature journal article supplement (doi:10.1007/s00406-019-01043-8), 2019-07-13
Supplement: MOESM1 [file 16926840]

**Prevalence of obesity, metabolic syndrome, diabetes and risk of cardiovascular disease in a psychiatric inpatient sample: Results of the Metabolism in Psychiatry (MiP) Study**

Barbara B. Barton1*, Anja Zagler1*, Katharina Engl1, Leonie Rihs1, Richard Musil1

1 Department of Psychiatry and Psychotherapy, University Hospital, LMU Munich, Germany

*shared authorship

**Correspondence Address:**

Barbara B. Barton, M.Sc.Psych.

Department of Psychiatry and Psychotherapy

University Hospital, LMU Munich, Germany

Nußbaumstraße 7

80336 München

[Barbara.Barton@med.uni-muenchen.de](mailto:Barbara.Barton@med.uni-muenchen.de)

Tel: 0049/89/4400-55316

Fax: 0049/89/4400-53413

A1. Criteria of the metabolic syndrome according to the NCEP-ATP-III and the IDF

| NCEP-ATP III | IDF |
| --- | --- |
| Any 3/5 criteria | Any 2/5 criteria AND abdominal girth |
| - TG ≥ 150 mg / dl or medication for the control of hypertriglyceridemia - HDL < 40 mg / dl - Blood pressure: systolic ≥ 130 and/or diastolic ≥ 85 mmHg or antihypertensive medication - Fasting glucose ≥ 100 mg / dl or blood glucose regulating medication - Waist circumference ≥ 102 cm for male patients or ≥ 88 cm for female patients | - TG ≥ 150 mg / dl or medication for the control of hypertriglyceridemia - HDL < 40 mg / dl in males   HDL < 50 mg/ dl in females   - Blood pressure: systolic ≥ 130 and/or diastolic ≥ 85 mmHg or antihypertensive medication - Fasting glucose ≥ 100 mg / dl or blood glucose regulating medication - Waist circumference ≥ 94 cm for male patients or ≥ 80 cm for female patients |
| *Note*. NCEP-ATP III: National Expert Panel on Detection, Evaluation and Treatment of High Blood Cholesterol in Adults; IDF: International Diabetes Federation; HDL: high-density lipoprotein cholesterol; TG: triglycerides | |
