# Supplementary material for: Prevalence of obesity, metabolic syndrome, diabetes and risk of cardiovascular disease in a psychiatric inpatient sample: results of the Metabolism in Psychiatry (MiP) Study
Source: Springer Nature journal article supplement (doi:10.1007/s00406-019-01043-8), 2019-07-13
Supplement: MOESM3 [file 16926840]

**Prevalence of obesity, metabolic syndrome, diabetes and risk of cardiovascular disease in a psychiatric inpatient sample: Results of the Metabolism in Psychiatry (MiP) Study**

Barbara B. Barton1*, Anja Zagler1*, Katharina Engl1, Leonie Rihs1, Richard Musil1

1 Department of Psychiatry and Psychotherapy, University Hospital, LMU Munich, Germany

*shared authorship

**Correspondence Address:**

Barbara B. Barton, M.Sc.Psych.

Department of Psychiatry and Psychotherapy

University Hospital, LMU Munich, Germany

Nußbaumstraße 7

80336 München

[Barbara.Barton@med.uni-muenchen.de](mailto:Barbara.Barton@med.uni-muenchen.de)

Tel: 0049/89/4400-55316

Fax: 0049/89/4400-53413

A3. Civil status and living situation

| Civil status *  Single  Married, living together  Relationship longer than 3 months  Divorced  Married, living separately  Widowed |  | 57.7% (94)  19.0% (31)  9.2% (15)  7.4% (12)  4.9 % (8)  0.6% (1) |
| --- | --- | --- |
| Number of own children  0  1  2  3  4 |  | **0.65 (±1.1)**  65.0% (106)  12.3% (20)  13.5% (22)  4.9% (8)  2.5% (4) |
| Living situation  Private accommodation/flat share  Assisted living  Without permanent residence  Dormitory  Psychiatric/therapeutic dormitory  Other |  | 90.2% (147)  2.5% (4)  3.1% (5)  1.8% (3)  0.6% (1)  0.6% (1) |
| Lives with*  Alone  Partner  Parents  Only children  Children and partner  Acquaintance/flat share  Without permanent residence  Siblings  Assisted living  Other relatives  Others |  | 32.5% (53)  29.4% (48)  12.9% (21)  3.1% (5)  9.8 % (16)  10.4% (17)  2.5% (4)  1.2% (2)  1.8% (3)  1.2% (2)  1.2% (2) |

*Note.* Total % exceeds 100%*
