# Supplementary material for: Prevalence of obesity, metabolic syndrome, diabetes and risk of cardiovascular disease in a psychiatric inpatient sample: results of the Metabolism in Psychiatry (MiP) Study
Source: Springer Nature journal article supplement (doi:10.1007/s00406-019-01043-8), 2019-07-13
Supplement: MOESM7 [file 16926840]

**Prevalence of obesity, metabolic syndrome, diabetes and risk of cardiovascular disease in a psychiatric inpatient sample: Results of the Metabolism in Psychiatry (MiP) Study**

Barbara B. Barton1*, Anja Zagler1*, Katharina Engl1, Leonie Rihs1, Richard Musil1

1 Department of Psychiatry and Psychotherapy, University Hospital, LMU Munich, Germany

*shared authorship

**Correspondence Address:**

Barbara B. Barton, M.Sc.Psych.

Department of Psychiatry and Psychotherapy

University Hospital, LMU Munich, Germany

Nußbaumstraße 7

80336 München

[Barbara.Barton@med.uni-muenchen.de](mailto:Barbara.Barton@med.uni-muenchen.de)

Tel: 0049/89/4400-55316

Fax: 0049/89/4400-53413

| A7. Comparisons of sociodemographic variables between patients with and without W/obese, MetS, moderate/high CVR | | | | | |
| --- | --- | --- | --- | --- | --- |
| **Variable** | **OW and obese N=77** | **UW and normal N=86** | | **Statistics** | |
| Age | 41.87 (SD=15.13) | 37.99 (SD=14.89) | | t(161)=-1.65, *p*=.101 | |
| **Gender male/female** | 53/24 | 45/41 | | *2*=4.62, *df*=1, ***p*=.032*** | |
| **Number of previous inpatient treatments** | 3.83 (SD=4.50) | 2.44 (SD=2.53) | | t(110)=-2.28, ***p*=.025*** | |
| Duration of previous inpatient treatment | 6.20 (SD=11.66) | 3.00 (SD=7.06) | | t(113)=-1.97, *p*=.052* | |
| Pharmaceutical pre-treatment (yes/no) | 61/11 | 71/15 | | *2*=0.13, *df*=1, *p*=.715 | |
| Age at onset of psychiatric abnormality | 29.57 (SD=17.08) | 28.93 (SD=14.00) | | t(159)=-0.26, *p*=.793 | |
| Age at first treatment | 33.59 (SD=16.28) | 31.58 (SD=13.43) | | t(159)=-0.86, *p*=.393 | |
| Suicidal behavior | 18/56 | 15/71 | | *2*=1.15, *df*=1, *p*=.283 | |
| Mental illness among blood relatives | 52/22 | 48/38 | | *2*=3.55, *df*=1, *p*=.060 | |
| Being single | 39/36 | 55/31 | | *2*=2.37, *df*=1, *p*=.125 | |
| Living alone | 15/43 | 15/41 | | *2*=0.01, *df*=1, *p*=.911 | |
| Mental health visits: physical pain | 35/24 | 36/31 | | *2*=2.18, *df*=1, *p*=.139 | |
| Mental health visits: psychological issues | 53/5 | 46/9 | | *2*=1.94, *df*=2, *p*=.380 | |
| Having children | 29/45 | 25/61 | | *2*=1.82, *df*=1, *p*=.177 | |
| Number of children | 0.81 (SD=1.14) | 0.51 (SD=0.95) | | t(158)=-1.804, *p*=.073 | |
| Having a job | 18/57 | 21/65 | | *2*=.00, *df*=1, *p*=.951 | |
| Working hours | 18.03 (SD=20.51) | 23.40(SD=19.07) | | t(105)=-1.40, *p*=.164 | |
| Income: <1500, 1500-3000, >3000 Euro | 13/42; 17/38; 6/49 | 21/34; 19/36; 5/50 | | *2*=2.72, *df*=1, *p*=.099;*2*=0.16, *df*=1, *p*=.684; *2*=0.10, *df*=1, *p*=.751 | |
| **Variable** | **MetS (IDF) N=42** | **No MetS (IDF) N=107** | | **Statistics** | |
| **Age** | 47.02 (SD=14.20) | 37.76 (SD=15.15) | | t(147)=-3.42***p*=.001*** | |
| Gender male/female | 27/15 | 63/44 | | *2*=0.37, *df*=1, *p*=.544 | |
| Number of previous inpatient treatments | 3.76 (SD=5.49) | 2.89 (SD=3.02) | | t(49.6)=-0.96, *p*=.343 | |
| Duration of previous inpatient treatment | 5.92 (SD=12.70) | 4.19 (SD=8.68) | | t(141)=-0.93, *p*=.355 | |
| Pharmaceutical pre-treatment (yes/no) | 33/6 | 88/18 | | *2*=0.53, *df*=1, *p*=.819 | |
| **Age at onset of psychiatric abnormality** | 34.76 (SD=17.54) | 28.36 (SD=14.70) | | t(146)=-2.24,***p*=.026*** | |
| **Age at first treatment** | 39.49 (SD=15.60) | 31.18 (SD=14.14) | | t(146)=-3.11,***p*=.002*** | |
| Suicidal behavior | 9/31 | 20/87 | | *2*=0.267, *df*=1, *p*=.606 | |
| Mental illness among blood relatives | 30/10 | 63/44 | | *2*=3.26, *df*=1, *p*=.071 | |
| Being single | 18/23 | 66/41 | | *2*=3.82, *df*=1, *p*=.051 | |
| Living alone | 10/18 | 17/59 | | *2*=1.90, *df*=1, *p*=.169 | |
| Mental health visits: physical pain | 18/11 | 35/42 | | *2*=2.33, *df*=1, *p*=.127 | |
| Mental health visits: psychological issues | 27/1 | 65/11 | | *p*=.190 | |
| **Having children** | 22/19 | 30/76 | | *2*=8.31, *df*=1, ***p*=.004*** | |
| **Number of children** | 1.10 (SD=1.24) | 0.51 (SD=9.39) | | t(58.56)=-2.75,***p*=.008*** | |
| Having a job | 8/33 | 28/79 | | *2*=0.71, *df*=1, *p*=.398 | |
| Working hours | 19.00 (SD=21.44) | 22.63 (SD=19.65) | | t(96)=-0.79, *p*=.429 | |
| Income: <1500, 1500-3000, >3000 Euro | 6/21; 9/18; 2/25 | 24/49; 23/50; 9/64 | | *2*=1.06, *df*=1, *p*=.302; *2*=0.03, *df*=1, *p*=.862; *p*=.722 | |
| **Variable** | **MetS 1 (ATP) N=35** | **No MetS1 (ATP) N=120** | | **Statistics** | |
| **Age** | 46.60 (SD=14.34) | 38.34 (SD=15.04) | | t(153)=-2.96,***p*=.004*** | |
| Gender male/female | 23/12 | 70/51 | | *2=*0.70, *df*=1, *p*=.404 | |
| Number of previous inpatient treatments | 3.65(SD=5.74) | 2.93 (SD=3.07) | | t(151)=-0.96, *p*=.337 | |
| Duration of previous inpatient treatment | 5.34 (SD=9.93) | 4.34 (SD=9.76) | | t(146)=-0.51, *p*=.610 | |
| Pharmaceutical pre-treatment (yes/no) | 27/5 | 99/19 | | *2=*0.04, *df*=1, *p*=.948 | |
| Age at onset of psychiatric abnormality | 33.88 (SD=17.00) | 28.65 (SD=15.04) | | t(151)=-1.74, *p*=.084 | |
| **Age at first treatment** | 39.38 (SD=14.74) | 31.25 (SD=14.53) | | t(151)=-2.90,***p*=.005*** | |
| Suicidal behavior | 8/26 | 22/96 | | *2=*0.40, *df*=1, *p*=.528 | |
| Mental illness among blood relatives | 25/9 | 72/46 | | *2=*1.79, *df*=1, *p*=.181 | |
| **Being single** | 12/22 | 75/44 | | *2=*8.29, *df*=1, ***p*=.004*** | |
| Lliving alone | 10/15 | 19/65 | | *2=*2.98, *df*=1, *p*=.084 | |
| Mental health visits: physical pain | 16/9 | 41/45 | | *2=*2.07, *df*=1, *p*=.151 | |
| Mental health visits: psychological issues | 24/0 | 72/13 | | *p*=.053 | |
| **Having children** | 19/15 | 34/84 | | *2=*8.52, *df*=1, ***p*=.004*** | |
| **Number of children** | 1.18 (SD=1.27) | 0.52 (SD=0.94) | | t(44.00)=-2.82,***p*=.007*** | |
| Having a job | 7/27 | 30/89 | | *2=*0.31, *df*=1, *p*=.579 | |
| Working hours | 25.10 (SD=21.42) | 20.60 (SD=19.48) | | t(100)=-0.95, *p*=.343 | |
| **Income**: <1500, 1500-3000, >3000 Euro | 3/20; 9/14; 3/20 | 28/54; 27/55; 8/74 | | *2=*3.84, *df*=1, ***p*=.050***; *2=*0.31, *df*=1, *p*=.580; *p*=.702 | |
| **Variable** | **mod./high CVR N=16** | **low CVR N=130** | | **Statistics** | |
| **Age** | 59.94 (SD=9.07) | 38.87 (SD=13.60) | | t(24.22)=-8.22,***p*=.000*** | |
| **Gender male/female** | 14/2 | 74/57 | | *2=*5.71, *df*=1, ***p*=.028*** | |
| Number of previous inpatient treatments | 2.69 (SD=2.82) | 3.23 (SD=4.04) | | t(142)=0.52, *p*=.606 | |
| Duration of previous inpatient treatment | 4.19 (SD=7.02) | 4.80 (SD=10.40) | | t(137)=0.23, *p*=.819 | |
| Pharmaceutical pre-treatment (yes/no) | 11/4 | 109/18 | | *p*=.206 | |
| **Age at onset of psychiatric abnormality** | 50.13 (SD=16.08) | 28.05 (SD=13.85) | | t(142)=-5.90,***p*=.000*** | |
| **Age at first treatment** | 50.44 (SD=16.09) | 31.59 (SD=13.36) | | t(142)=-5.20,***p*=.000*** | |
| Suicidal behavior | 2/14 | 27/100 | | *p*=.527 | |
| Mental illness among blood relatives | 7/9 | 85/42 | | *2=*3.33, *df*=1, *p*=.068 | |
| **Being single** | 5/11 | 75/53 | | *2=*4.31, *df*=1, ***p*=.038*** | |
| Living alone | 4/4 | 23/72 | | *p*=.202 | |
| Mental health visits: physical pain | 4/4 | 49/48 | | *p*=1.000 | |
| Mental health visits: psychological issues | 7/0 | 85/11 | | *p*=.180 | |
| **Having children** | 12/4 | 40/87 | | *2=*11.62, *df*=1, ***p*=.001*** | |
| **Number of children** | 1.50 (SD=1.15) | 0.58 (SD=1.00) | | t(141)=-3.39,***p*=.001*** | |
| Having a job | 1/15 | 28/100 | | *p*=.195 | |
| **Working hours** | 6.25 (SD=14.08) | 22.94 (SD=19.35) | | t(9.53)=3.10,***p*=.012*** | |
| **Income**: <1500, 1500-3000, >3000 Euro | 0/8; 0/8;2/6 | 29/64; 34/59; 9/84 | | *p*=.101; ***p*=.049***; *p*=.210 | |
| *Note.* MetS=Metabolic Syndrome; CVR=Cardiovascular Risk; mod.=moderate; 1NCEP-ATP III: National Expert Panel on Detection, Evaluation and Treatment of High Blood Cholesterol in Adults; IDF: International Diabetes Federation; OW=overweight; UW=underweight; **p<.05* | | | | | |
|  |  | |  | |  |
